# Supplementary material
Source: PubMed Central journal article supplement (PMC3685259)
Supplement: AEM.03971-12_zam999104378so1.pdf [file AEM.03971-12_zam999104378so1.pdf]

1Supplemental Material

2

3 **SUPPLEMENTAL MATERIAL for the manuscript**

4

5 ***“Candidatus Midichloriaceae” fam. nov. (Rickettsiales), an ecologically***  
6 ***widespread clade of intracellular alpha-proteobacteria***

7

8

9 Submitted to Applied and Environmental Microbiology as Long-Form  
10 Papers

11

12

13This file includes:

14

15Figures and Legends S1, S2, S3, S4, S5, S6, S7, S8, S9, S10, S11, S12 and S13.

16

17Table S1.

18



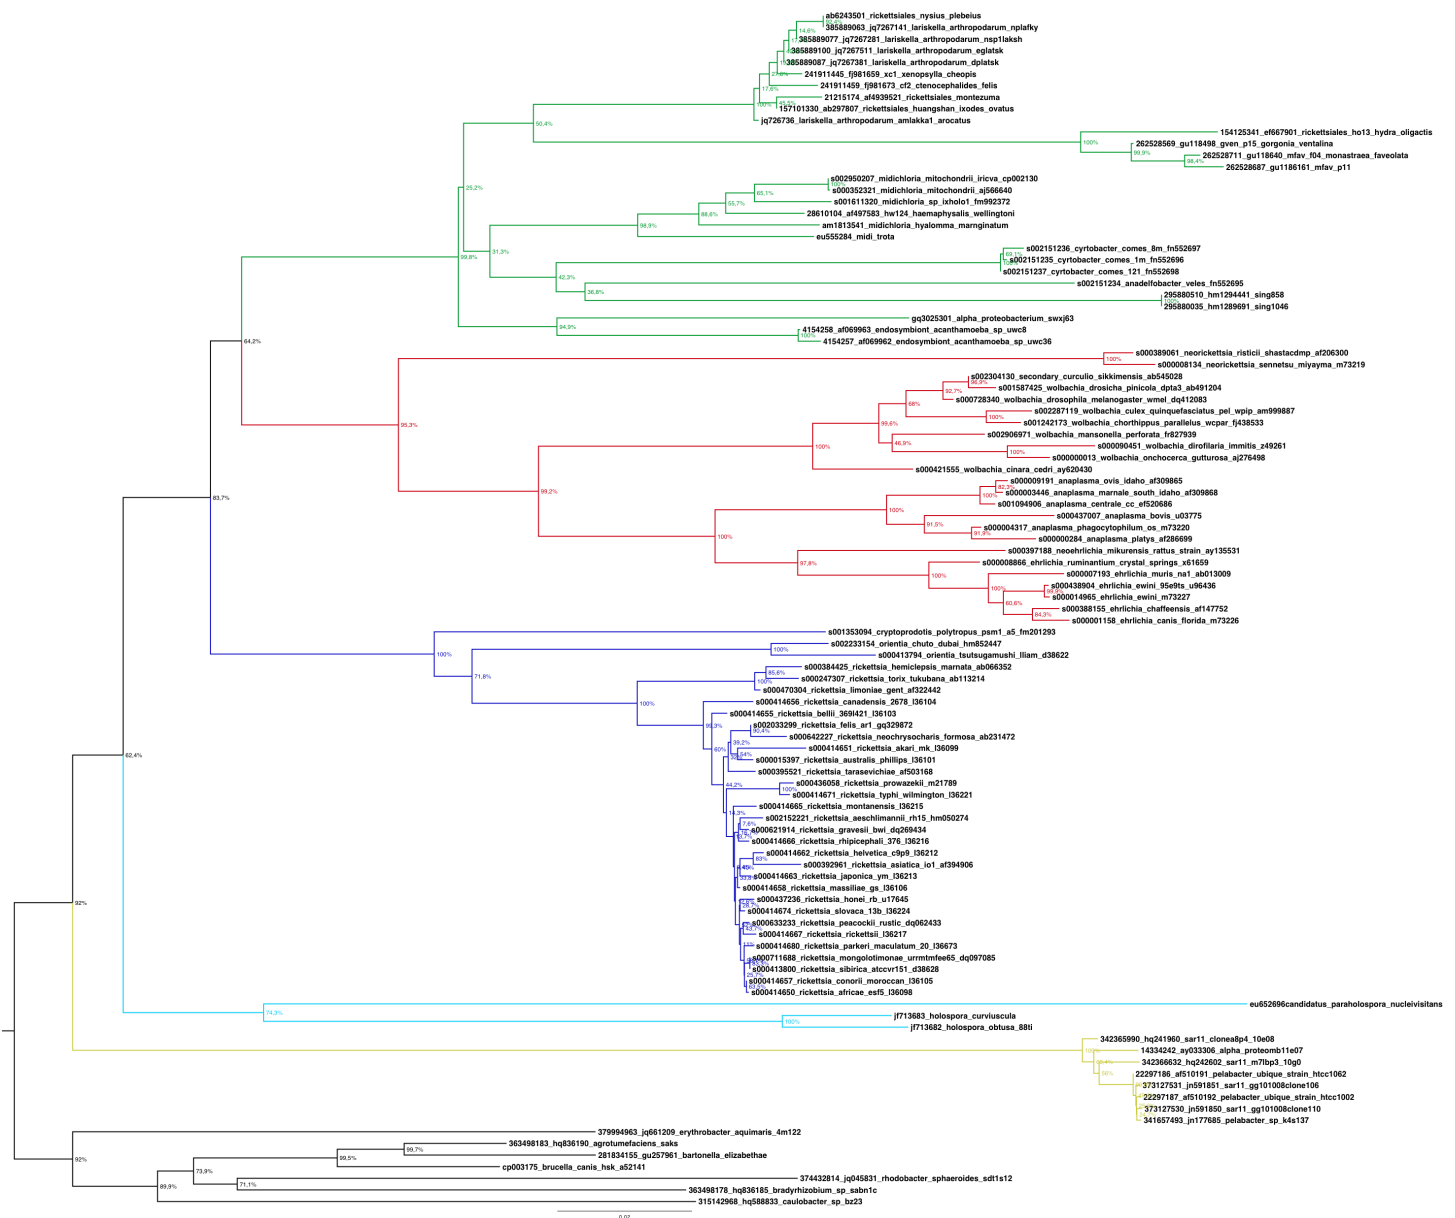

26FIG. S2. Neighbor-joining phylogram calculated on the 16S rRNA gene sequences A1  
 27alignment, bootstrap values are reported on nodes. Branches of the four *Rickettsiales*  
 28families plus MALOs are reported in different colors: MALOs in green,  
 29*Anaplasmataceae* in red, *Rickettsiaceae* in dark blue, *Holosporaceae* in light blue and  
 30*Pelagibacteraceae* in yellow.

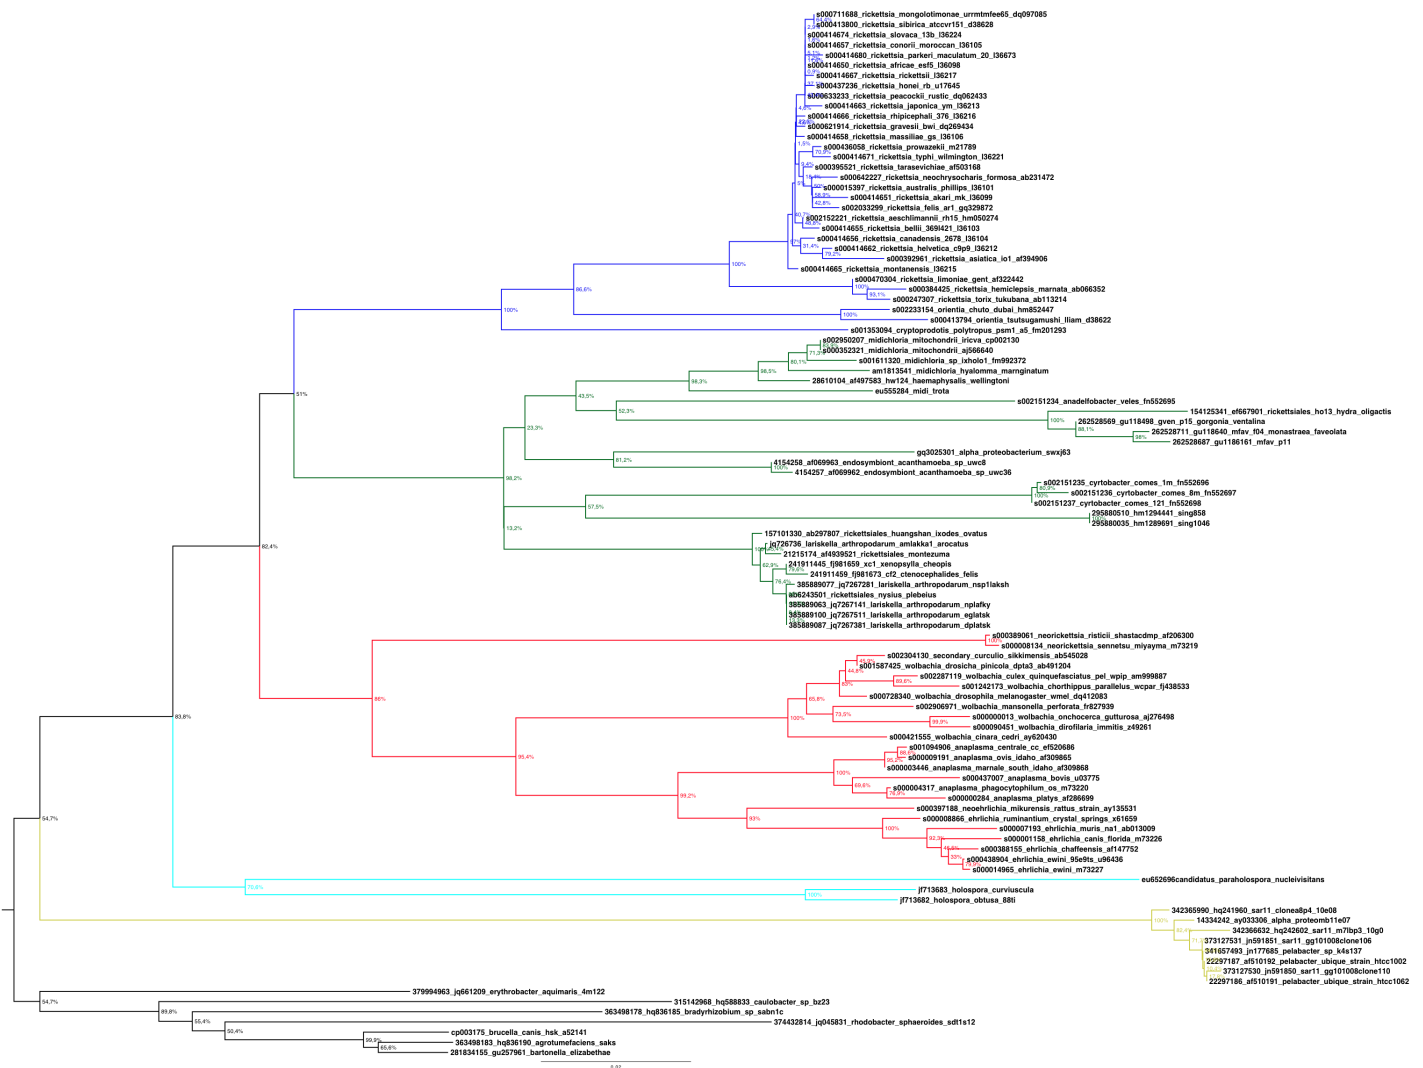

33FIG. S3. Neighbor-joining phylogram calculated on the 16S rRNA gene sequences Bc  
 34alignment, bootstrap values are reported on nodes. Branches of the four *Rickettsiales*  
 35families plus MALOs are reported in different colors: MALOs in green,  
 36*Anaplasmataceae* in red, *Rickettsiaceae* in dark blue, *Holosporaceae* in light blue and  
 37*Pelagibacteraceae* in yellow.

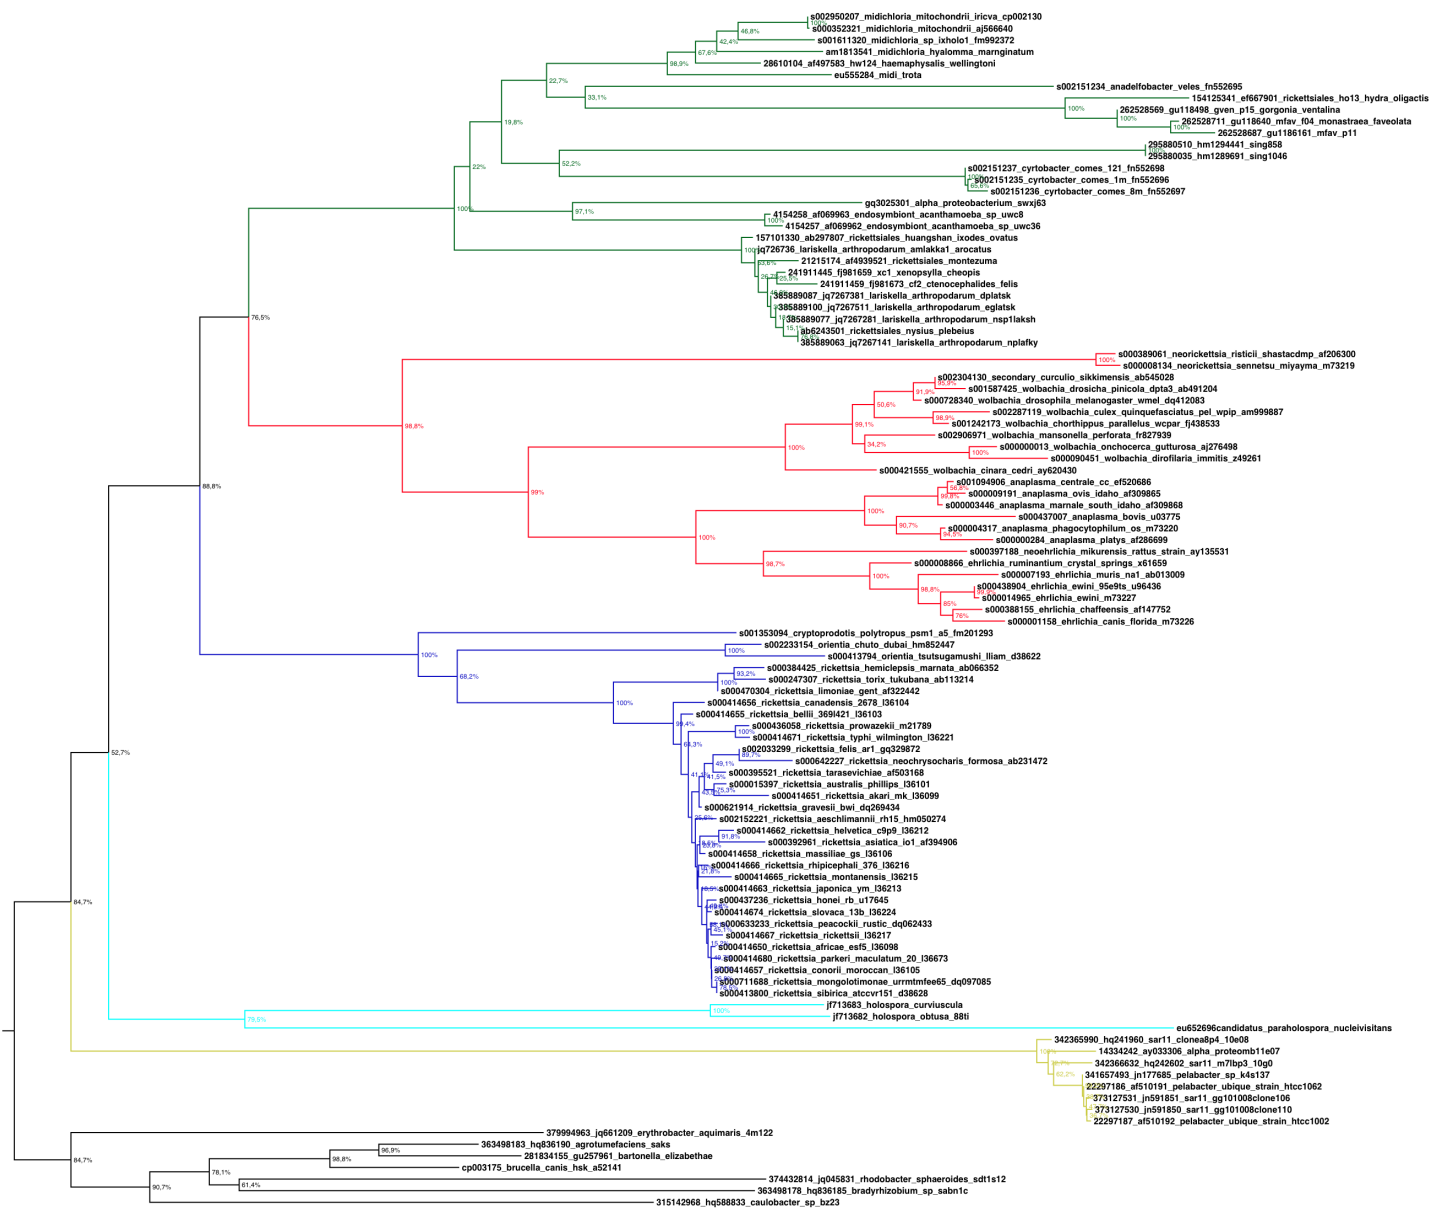

39FIG. S4. Neighbor-joining phylogram calculated on the 16S rRNA gene sequences BI 40alignment, bootstrap values are reported on nodes. Branches of the four *Rickettsiales* 41families plus MALOs are reported in different colors: MALOs in green, 42*Anaplasmataceae* in red, *Rickettsiaceae* in dark blue, *Holosporaceae* in light blue and 43*Pelagibacteraceae* in yellow.

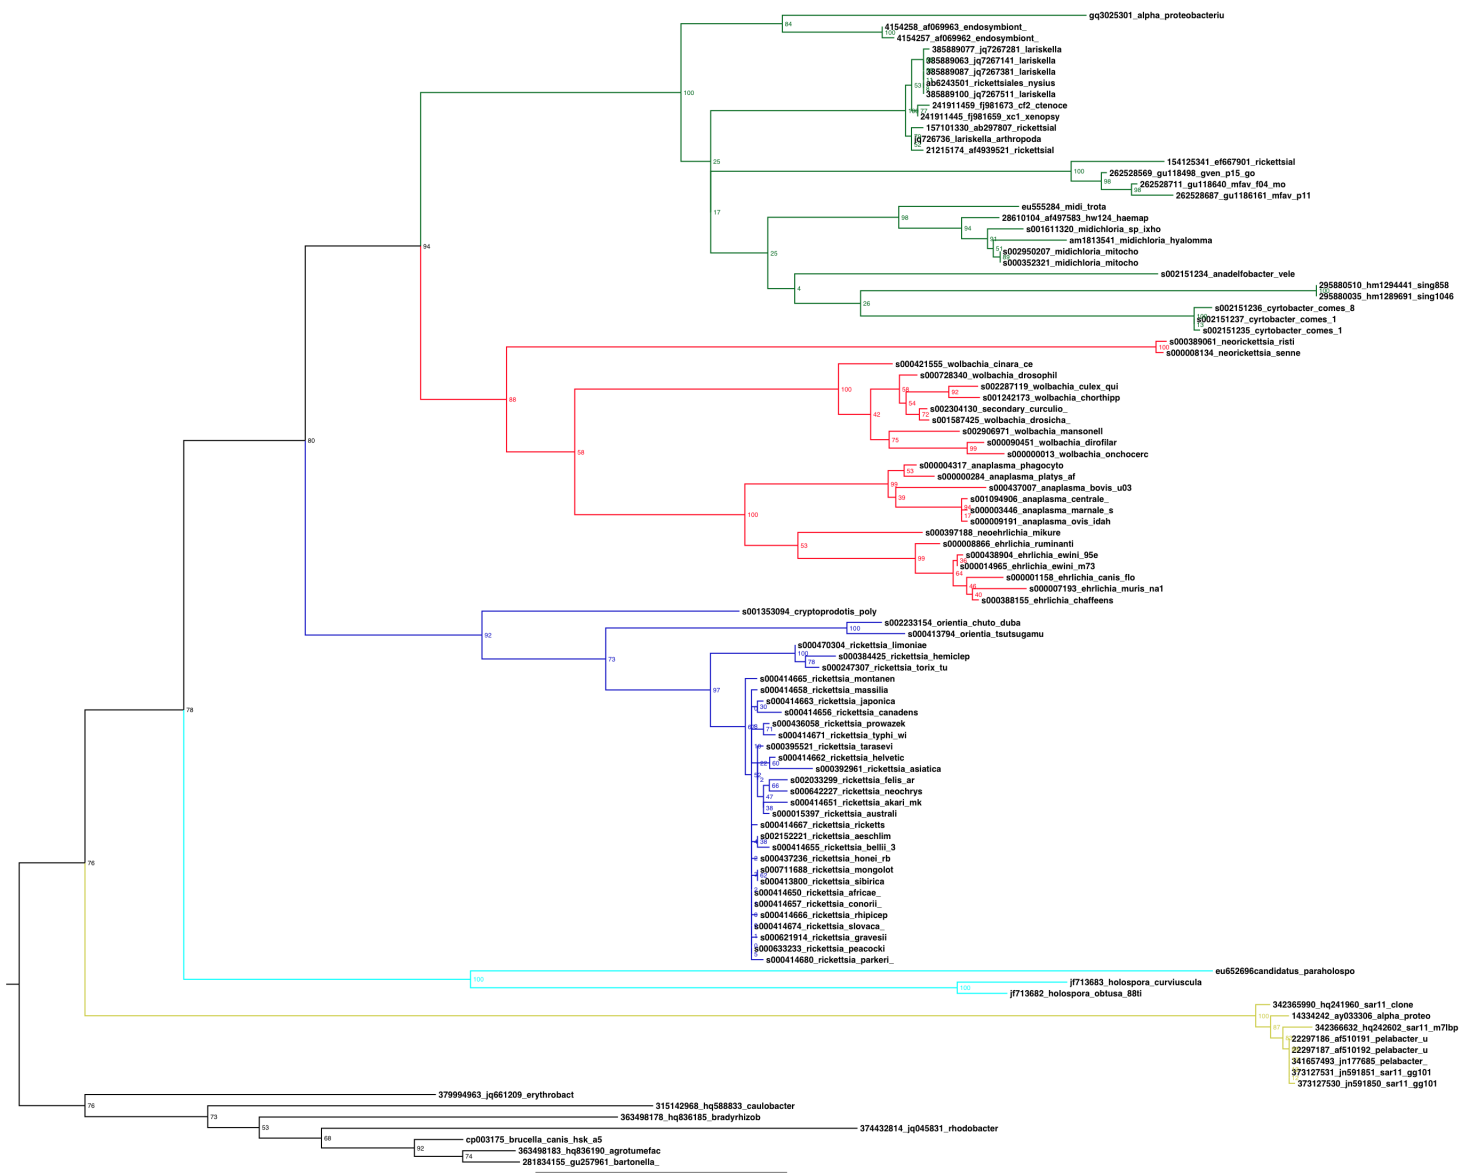

46FIG. S5. Maximum likelihood phylogram calculated on the 16S rRNA gene  
 47sequences Ac alignment, bootstrap values are reported on nodes. Branches of the four  
 48*Rickettsiales* families plus MALOs are reported in different colors: MALOs in green,  
 49*Anaplasmataceae* in red, *Rickettsiaceae* in dark blue, *Holosporaceae* in light blue and  
 50*Pelagibacteraceae* in yellow.

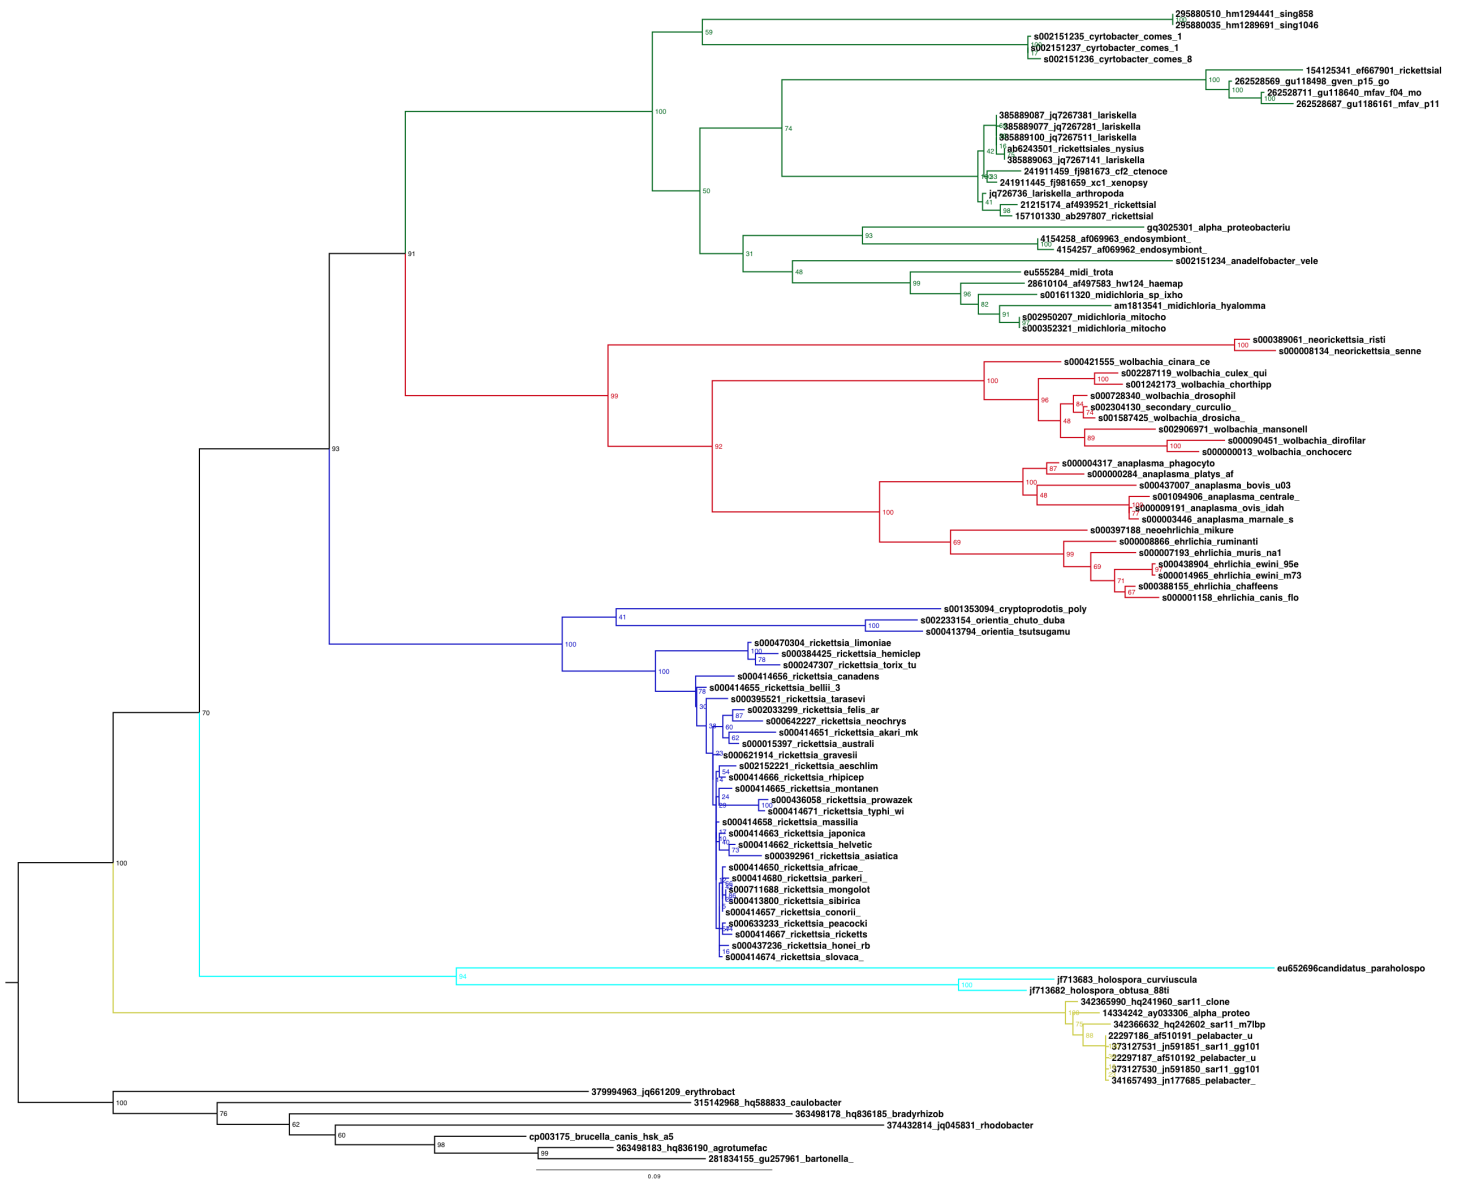

52FIG. S6. Maximum likelihood phylogram calculated on the 16S rRNA gene  
 53sequences A1 alignment, bootstrap values are reported on nodes. Branches of the four  
 54*Rickettsiales* families plus MALOs are reported in different colors: MALOs in green,  
 55*Anaplasmataceae* in red, *Rickettsiaceae* in dark blue, *Holosporaceae* in light blue and  
 56*Pelagibacteraceae* in yellow.

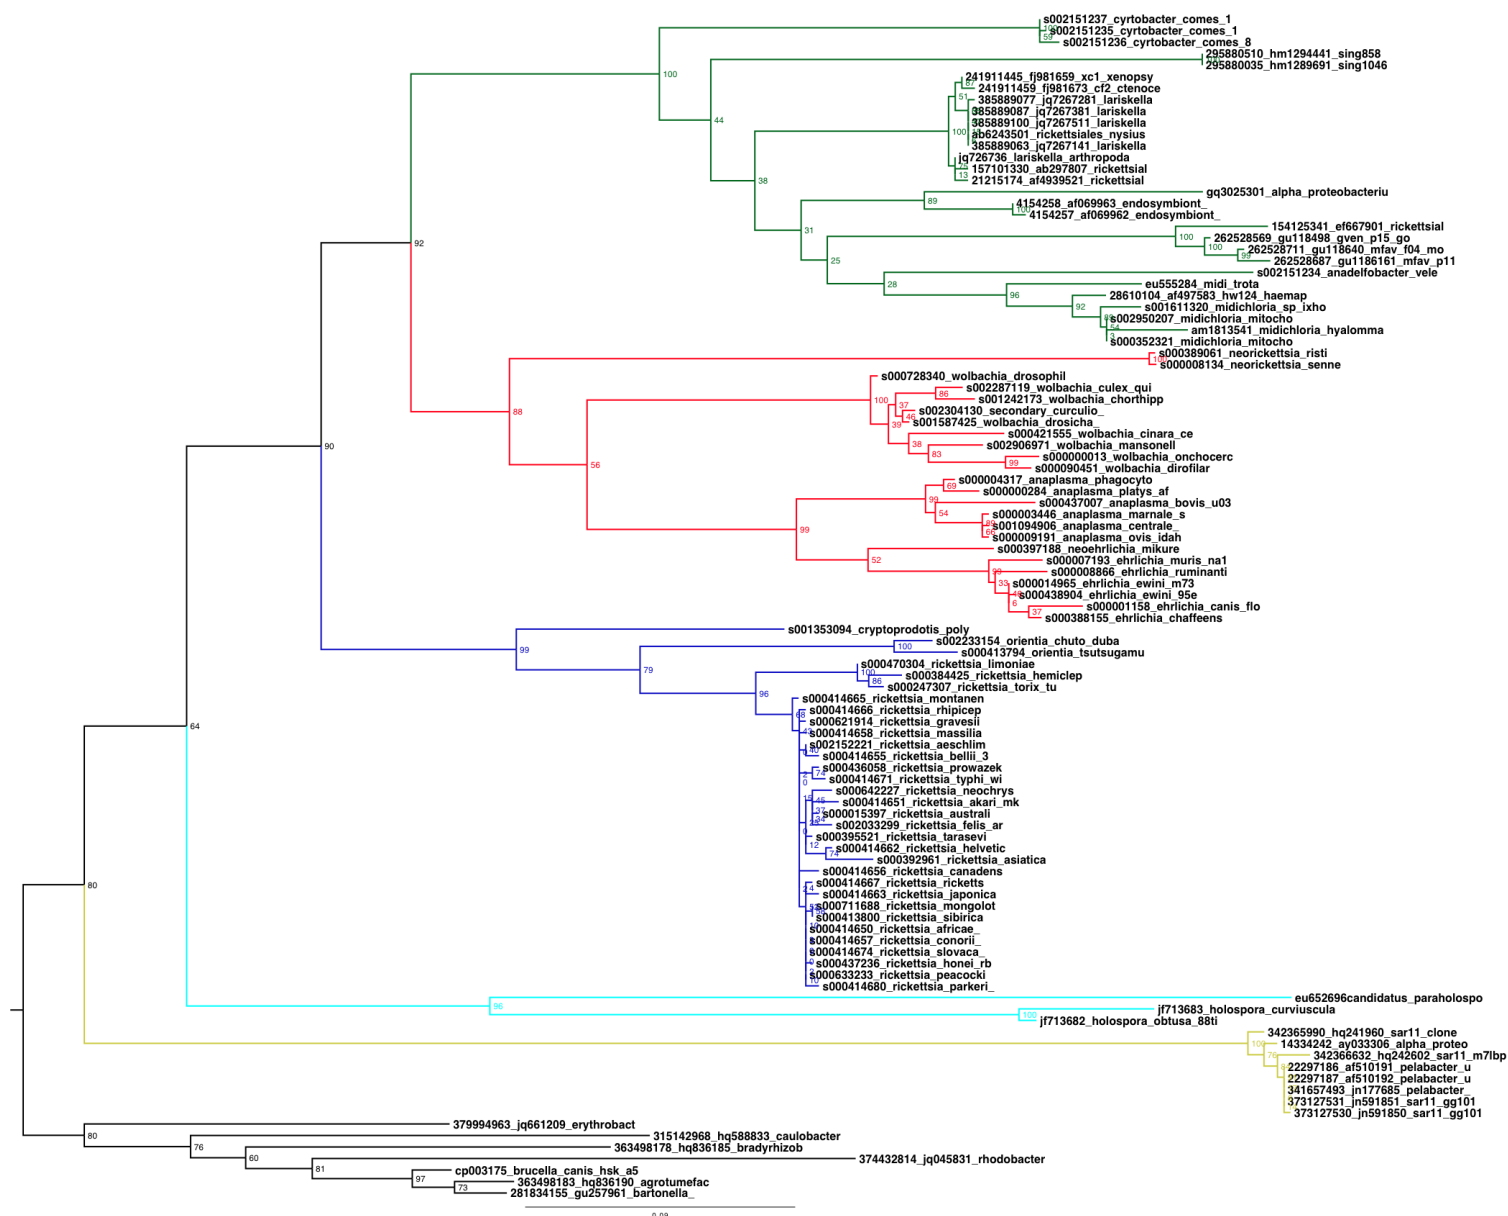

58FIG. S7. Maximum likelihood phylogram calculated on the 16S rRNA gene  
59sequences Bc alignment, bootstrap values are reported on nodes. Branches of the four  
60*Rickettsiales* families plus MALOs are reported in different colors: MALOs in green,  
61*Anaplasmataceae* in red, *Rickettsiaceae* in dark blue, *Holoosporaceae* in light blue and  
62*Pelagibacteraceae* in yellow.



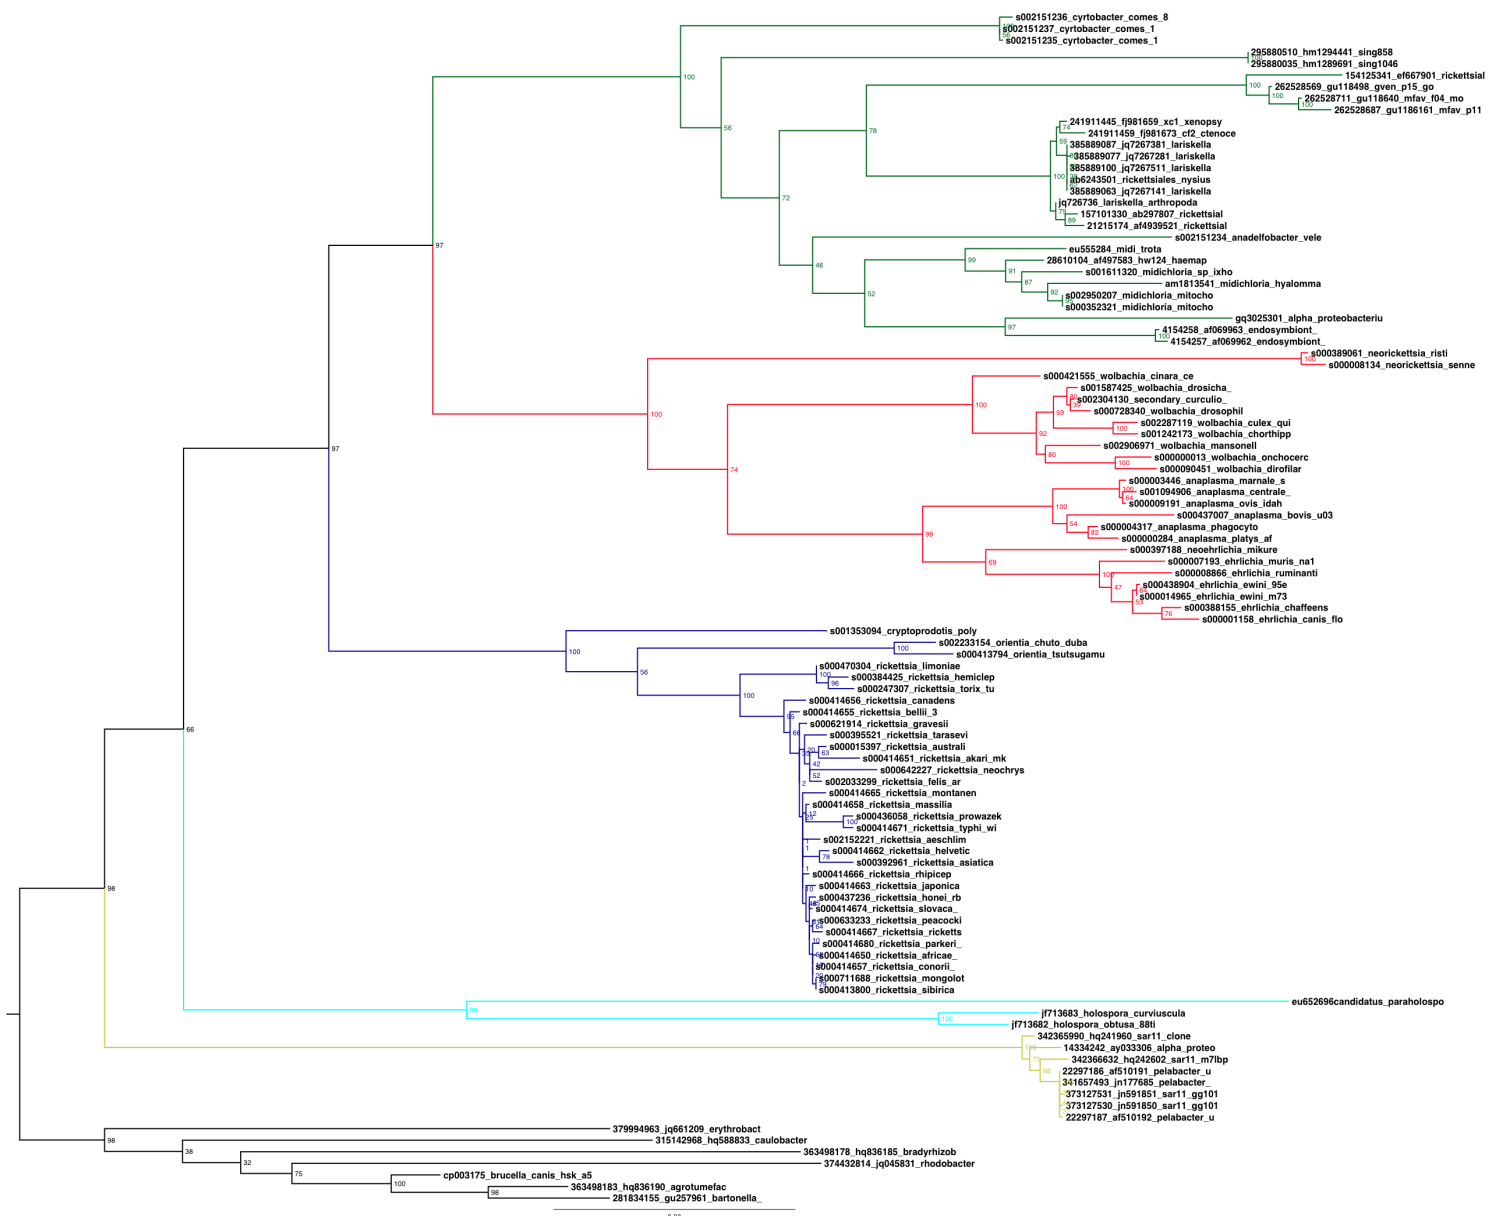

64FIG. S8. Maximum likelihood phylogram calculated on the 16S rRNA gene  
65sequences Bl alignment, bootstrap values are reported on nodes. Branches of the four  
66*Rickettsiales* families plus MALOs are reported in different colors: MALOs in green,  
67*Anaplasmataceae* in red, *Rickettsiaceae* in dark blue, *Holosporaceae* in light blue and  
68*Pelagibacteraceae* in yellow.

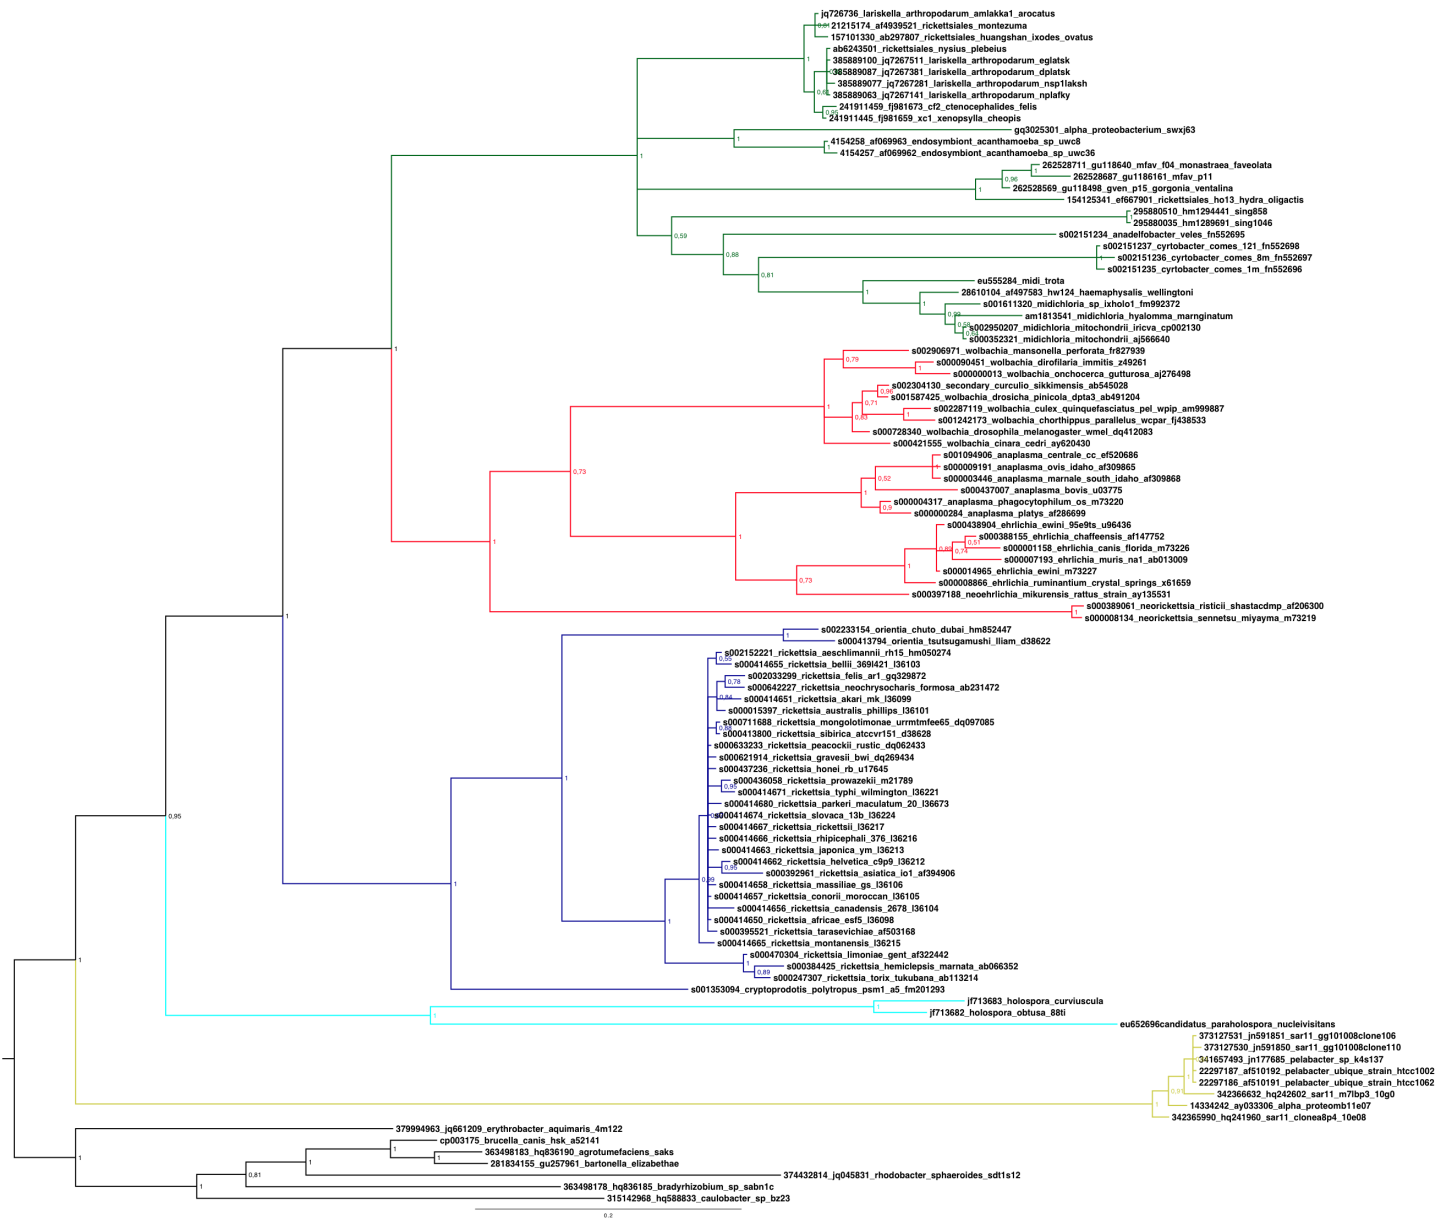

70FIG. S9. Bayesian phylogram calculated on the 16S rRNA gene sequences Ac  
71alignment, bayesian posterior probability values are reported on nodes. Branches of  
72the four *Rickettsiales* families plus MALOs are reported in different colors: MALOs  
73in green, *Anaplasmataceae* in red, *Rickettsiaceae* in dark blue, *Holosporaceae* in light  
74blue and *Pelagibacteraceae* in yellow.

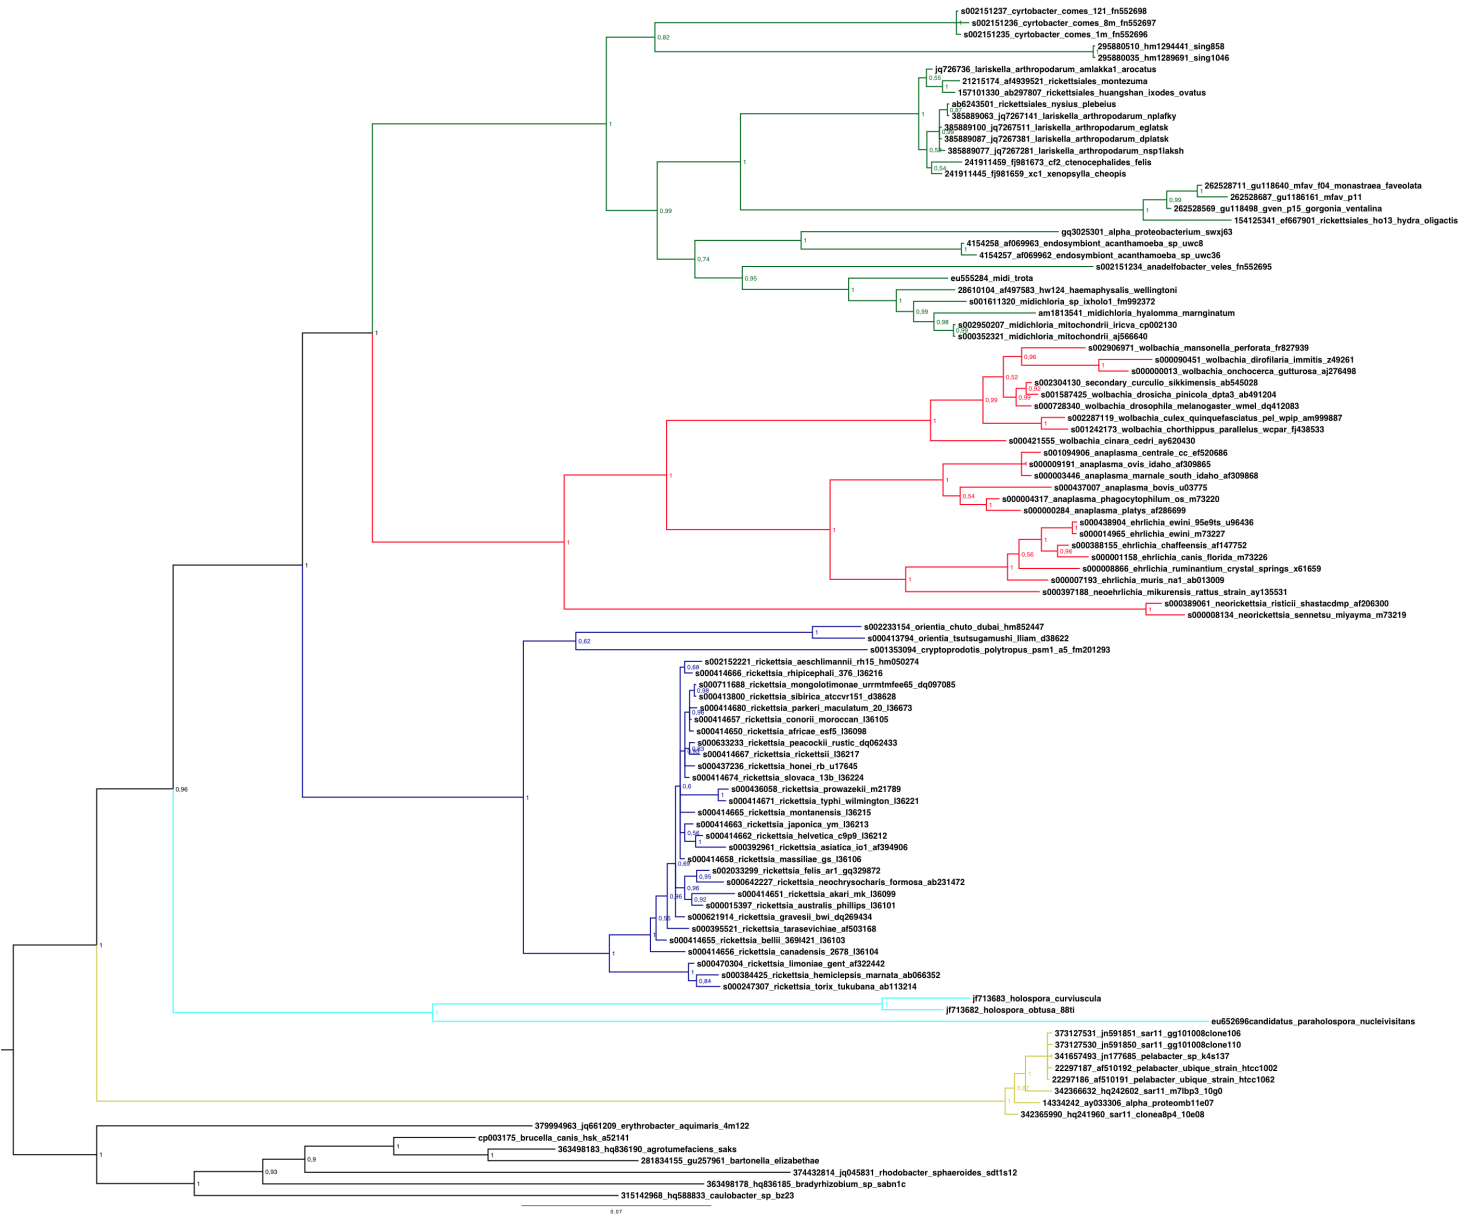

76FIG. S10. Bayesian phylogram calculated on the 16S rRNA gene sequences A1  
 77alignment, bayesian posterior probability values are reported on nodes. Branches of  
 78the four *Rickettsiales* families plus MALOs are reported in different colors: MALOs  
 79in green, *Anaplasmataceae* in red, *Rickettsiaceae* in dark blue, *Holosporaceae* in light  
 80blue and *Pelagibacteraceae* in yellow.

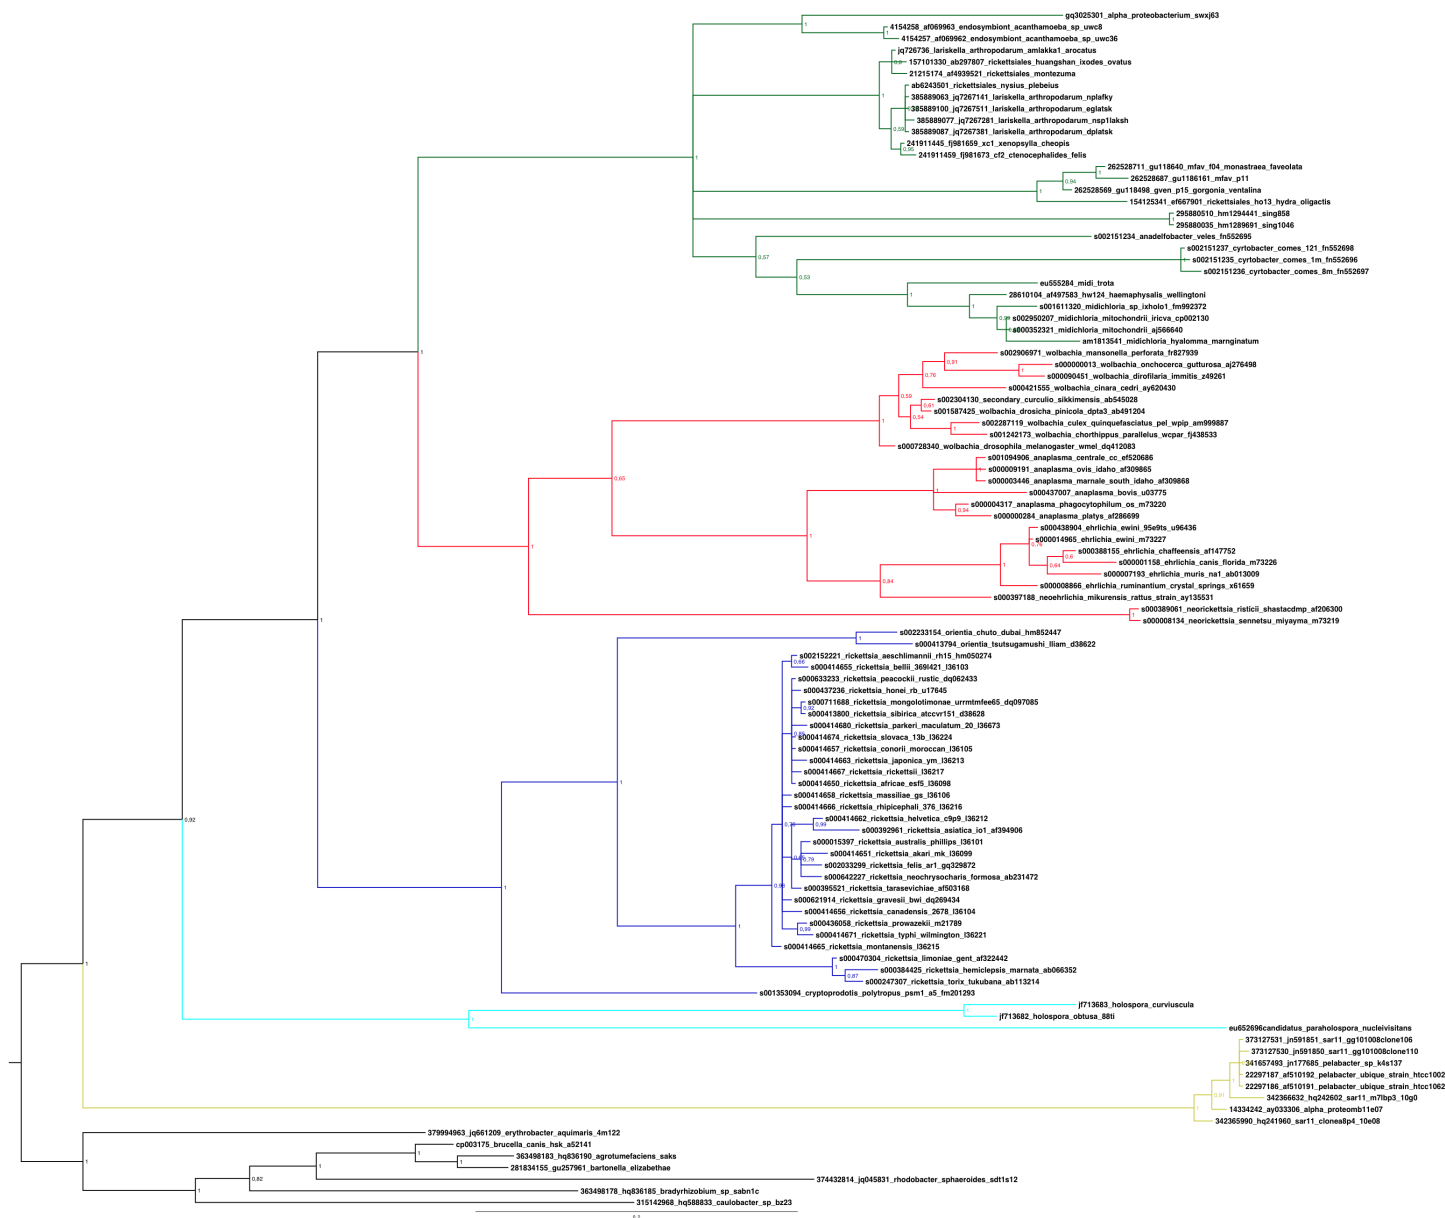

82FIG. S11. Bayesian phylogram calculated on the 16S rRNA gene sequences Bc  
83alignment, bayesian posterior probability values are reported on nodes. Branches of  
84the four *Rickettsiales* families plus MALOs are reported in different colors: MALOs  
85in green, *Anaplasmataceae* in red, *Rickettsiaceae* in dark blue, *Holosporaceae* in light  
86blue and *Pelagibacteraceae* in yellow.

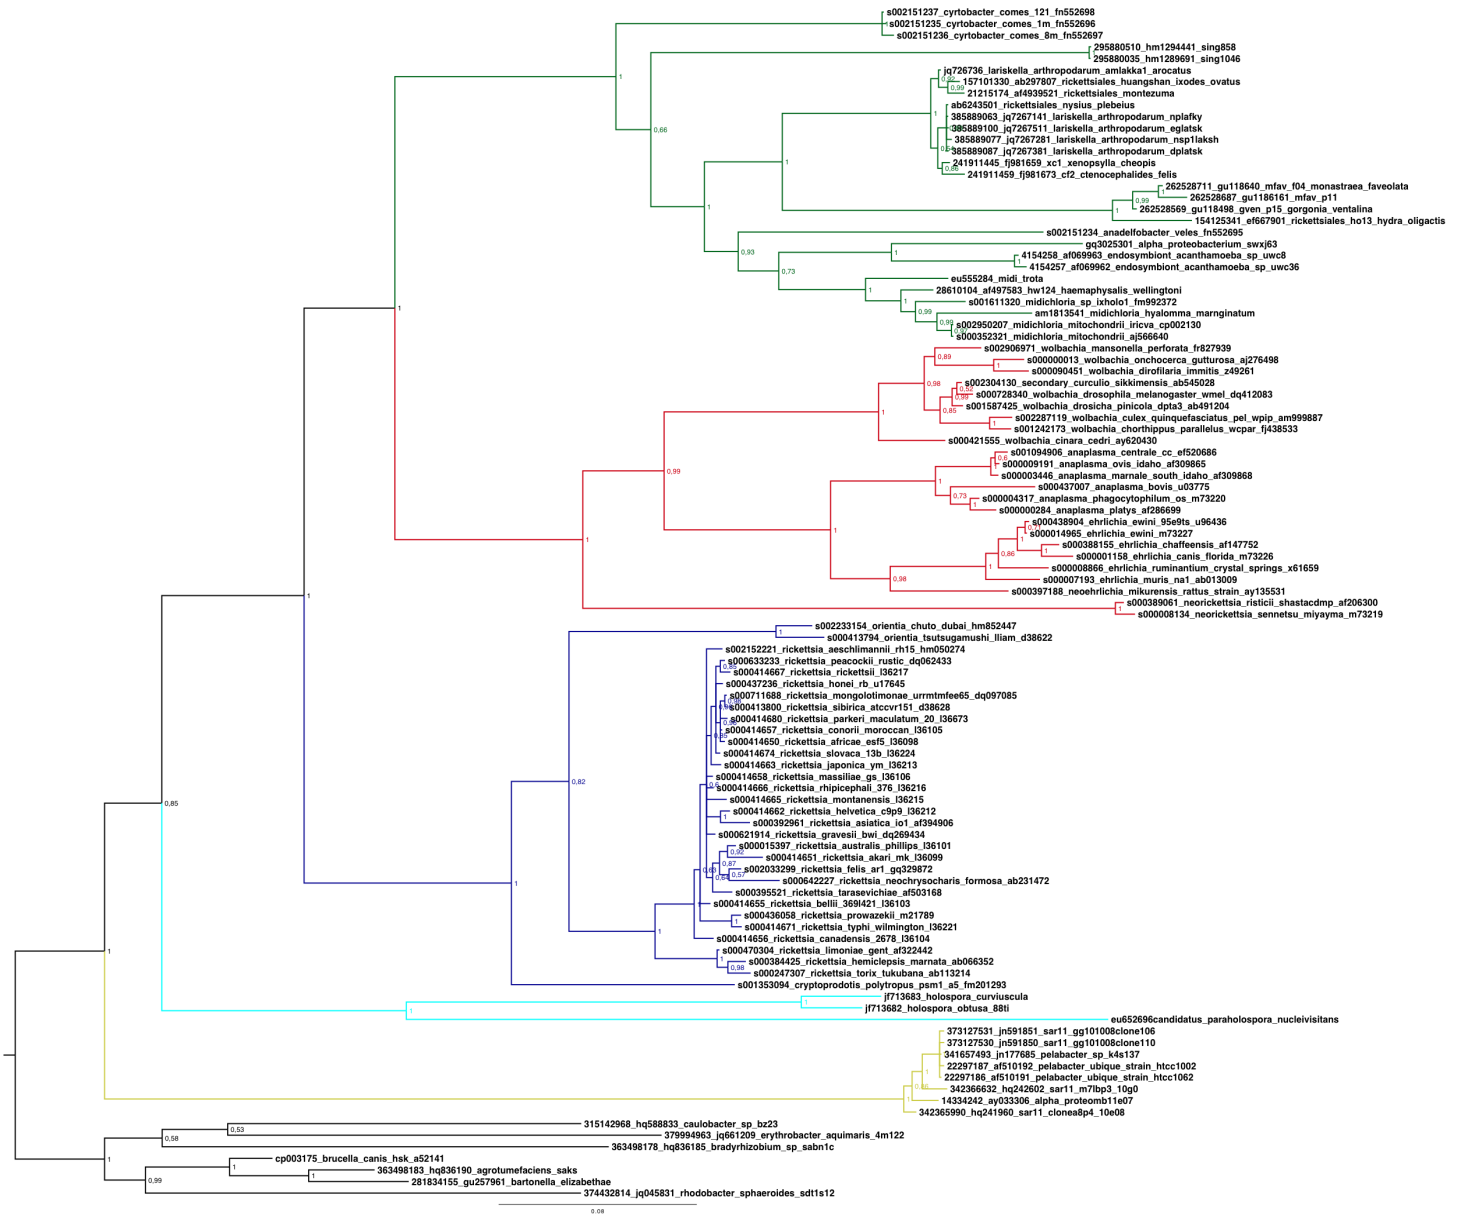

88FIG. S12. Bayesian phylogram calculated on the 16S rRNA gene sequences BI  
 89alignment, bayesian posterior probability values are reported on nodes. Branches of  
 90the four *Rickettsiales* families plus MALOs are reported in different colors: MALOs  
 91in green, *Anaplasmataceae* in red, *Rickettsiaceae* in dark blue, *Holosporaceae* in light  
 92blue and *Pelagibacteraceae* in yellow.

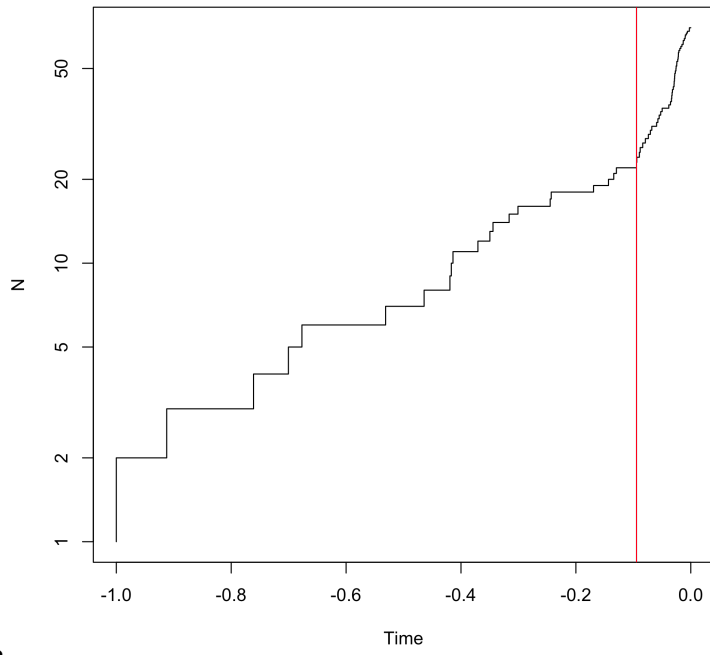

93

94FIG. S13. Lineage Through Time Plot.

95

96 Table S1. Accession numbers of 16S rRNA gene sequences  
 97 belonging to 103 OTUs/species analyzed in this study.

| ORDER            | FAMILY             | SPECIES                                              | ACCESSION NUMBER |
|------------------|--------------------|------------------------------------------------------|------------------|
| Rhizobiales      | Brucellaceae       | <i>Brucella canis</i>                                | CP003175         |
| Rhizobiales      | Rhizobiaceae       | <i>Agrobacterium tumefaciens</i>                     | HQ836190         |
| Rhizobiales      | Bartonellaceae     | <i>Bartonella elizabethae</i>                        | GU257961         |
| Rhodobacterales  | Rhodobacteraceae   | <i>Rhodobacter sphaeroides</i>                       | JQ045831         |
| Rhizobiales      | Bradyrhizobiaceae  | <i>Bradyrhizobium</i> sp.                            | HQ836185         |
| Caulobacterales  | Caulobacteraceae   | <i>Caulobacter</i> sp.                               | HQ588833         |
| Sphingomonadales | Erythrobacteraceae | <i>Erythrobacter aquimaris</i>                       | JQ661209         |
| Rickettsiales    | Pelagibacteraceae  | SAR11 cluster                                        | JN591851         |
| Rickettsiales    | Pelagibacteraceae  | SAR11 cluster                                        | JN591850         |
| Rickettsiales    | Pelagibacteraceae  | <i>Pelagibacter</i> sp.                              | JN177685         |
| Rickettsiales    | Pelagibacteraceae  | <i>Pelagibacter ubique</i> HTCC1062                  | AF510191         |
| Rickettsiales    | Pelagibacteraceae  | <i>Pelagibacter ubique</i> HTCC1002                  | AF510192         |
| Rickettsiales    | Pelagibacteraceae  | SAR11 cluster                                        | HQ242602         |
| Rickettsiales    | Pelagibacteraceae  | uncultured MB11E07 (from plankton)                   | AY033306         |
| Rickettsiales    | Pelagibacteraceae  | SAR11 cluster                                        | HQ241960         |
| Rickettsiales    | Holosporaceae      | <i>Holospora curviuscula</i>                         | JF713683         |
| Rickettsiales    | Holosporaceae      | <i>Holospora obtusa</i>                              | JF713682         |
| Rickettsiales    | Holosporaceae      | <i>Candidatus Paraholospora nucleivisitans</i>       | EU652696         |
| Rickettsiales    | Rickettsiaceae     | <i>Orientia chuto</i>                                | HM852447         |
| Rickettsiales    | Rickettsiaceae     | <i>Orientia tsutsugamushi</i>                        | D38622           |
| Rickettsiales    | Rickettsiaceae     | <i>Cryptoprodotis polytropus</i>                     | FM201293         |
| Rickettsiales    | Rickettsiaceae     | <i>Rickettsia limoniae</i>                           | AF322442         |
| Rickettsiales    | Rickettsiaceae     | <i>Rickettsia endosymbiont Hemiclepsis marginata</i> | AB066352         |
| Rickettsiales    | Rickettsiaceae     | <i>Rickettsia endosymbiont Torix tukubana</i>        | AB113214         |
| Rickettsiales    | Rickettsiaceae     | <i>Rickettsia aeschlimannii</i>                      | HM050274         |
| Rickettsiales    | Rickettsiaceae     | <i>Rickettsia rhipicephali</i>                       | L36216           |
| Rickettsiales    | Rickettsiaceae     | <i>Rickettsia mongolotimonae</i>                     | DQ097085         |
| Rickettsiales    | Rickettsiaceae     | <i>Rickettsia sibirica</i>                           | D38628           |
| Rickettsiales    | Rickettsiaceae     | <i>Rickettsia parkeri</i>                            | L36673           |
| Rickettsiales    | Rickettsiaceae     | <i>Rickettsia conorii</i>                            | L36105           |
| Rickettsiales    | Rickettsiaceae     | <i>Rickettsia africae</i>                            | L36098           |
| Rickettsiales    | Rickettsiaceae     | <i>Rickettsia peacockii</i>                          | DQ062433         |
| Rickettsiales    | Rickettsiaceae     | <i>Rickettsia rickettsii</i>                         | L36217           |
| Rickettsiales    | Rickettsiaceae     | <i>Rickettsia honei</i>                              | U17645           |
| Rickettsiales    | Rickettsiaceae     | <i>Rickettsia slovacae</i>                           | L36224           |
| Rickettsiales    | Rickettsiaceae     | <i>Rickettsia prowazekii</i>                         | M21789           |
| Rickettsiales    | Rickettsiaceae     | <i>Rickettsia typhi</i>                              | L36221           |
| Rickettsiales    | Rickettsiaceae     | <i>Rickettsia montanensis</i>                        | L36215           |
| Rickettsiales    | Rickettsiaceae     | <i>Rickettsia japonica</i>                           | L36213           |

|               |                 |                                                    |           |
|---------------|-----------------|----------------------------------------------------|-----------|
| Rickettsiales | Rickettsiaceae  | Rickettsia helvetica                               | L36212    |
| Rickettsiales | Rickettsiaceae  | Rickettsia asiatica                                | AF394906  |
| Rickettsiales | Rickettsiaceae  | Rickettsia massiliae                               | L36106    |
| Rickettsiales | Rickettsiaceae  | Rickettsia felis                                   | GQ329872  |
| Rickettsiales | Rickettsiaceae  | Rickettsia endosymbiont<br>Neochrysocharis formosa | AB231472  |
| Rickettsiales | Rickettsiaceae  | Rickettsia akari                                   | L36099    |
| Rickettsiales | Rickettsiaceae  | Rickettsia australis                               | L36101    |
| Rickettsiales | Rickettsiaceae  | Rickettsia gravesii                                | DQ269434  |
| Rickettsiales | Rickettsiaceae  | Rickettsia tarasevichiae                           | AF503168  |
| Rickettsiales | Rickettsiaceae  | Rickettsia bellii                                  | L36103    |
| Rickettsiales | Rickettsiaceae  | Rickettsia canadensis                              | L36104    |
| Rickettsiales | Anaplasmataceae | Wolbachia Mansonella perforata                     | FR827939  |
| Rickettsiales | Anaplasmataceae | Wolbachia Dirofilaria immitis                      | Z49261    |
| Rickettsiales | Anaplasmataceae | Wolbachia Onchocerca gutturosa                     | AJ276498  |
| Rickettsiales | Anaplasmataceae | Endosymbiont Curculio sikkimensis                  | AB545028  |
| Rickettsiales | Anaplasmataceae | Wolbachia Drosicha pinicola                        | AB491204  |
| Rickettsiales | Anaplasmataceae | Wolbachia Drosophila melanogaster                  | DQ412083  |
| Rickettsiales | Anaplasmataceae | Wolbachia Culex quinquefasciatus                   | AM999887  |
| Rickettsiales | Anaplasmataceae | Wolbachia Chorthippus parallelus                   | FJ438533  |
| Rickettsiales | Anaplasmataceae | Wolbachia Cinara cedri                             | AY620430  |
| Rickettsiales | Anaplasmataceae | Anaplasma centrale                                 | EF520686  |
| Rickettsiales | Anaplasmataceae | Anaplasma ovis                                     | AF309865  |
| Rickettsiales | Anaplasmataceae | Anaplasma marginale                                | AF309868  |
| Rickettsiales | Anaplasmataceae | Anaplasma bovis                                    | U03775    |
| Rickettsiales | Anaplasmataceae | Anaplasma phagocytophilum                          | M73220    |
| Rickettsiales | Anaplasmataceae | Anaplasma platys                                   | AF286699  |
| Rickettsiales | Anaplasmataceae | Ehrlichia ewini                                    | U96436    |
| Rickettsiales | Anaplasmataceae | Ehrlichia ewingii                                  | M73227    |
| Rickettsiales | Anaplasmataceae | Ehrlichia chaffeensis                              | AF147752  |
| Rickettsiales | Anaplasmataceae | Ehrlichia canis                                    | M73226    |
| Rickettsiales | Anaplasmataceae | Ehrlichia ruminantium                              | X61659    |
| Rickettsiales | Anaplasmataceae | Ehrlichia muris                                    | AB013009  |
| Rickettsiales | Anaplasmataceae | Neoehrlichia mikurensis                            | AY135531  |
| Rickettsiales | Anaplasmataceae | Neorickettsia risticii                             | AF206300  |
| Rickettsiales | Anaplasmataceae | Neorickettsia sennetsu                             | M73219    |
| Rickettsiales | Midichloriaceae | Cyrtobacter comes                                  | FN552698  |
| Rickettsiales | Midichloriaceae | Cyrtobacter comes                                  | FN552697  |
| Rickettsiales | Midichloriaceae | Cyrtobacter comes                                  | FN552696  |
| Rickettsiales | Midichloriaceae | uncultured bacterium from Kelike Lake              | HM129444  |
| Rickettsiales | Midichloriaceae | uncultured bacterium from Kelike Lake              | HM128969  |
| Rickettsiales | Midichloriaceae | Lariskella arthropodarum AmLaKka1                  | JQ726736  |
| Rickettsiales | Midichloriaceae | Montezuma                                          | AF4939521 |
| Rickettsiales | Midichloriaceae | Huangshan-1 Ixodes ovatus                          | AB297807  |
| Rickettsiales | Midichloriaceae | Lariskella arthropodarum NpTa1                     | AB624350  |
| Rickettsiales | Midichloriaceae | Lariskella arthropodarum NpLaFky                   | JQ726714  |



|               |                 |                                                                    |           |
|---------------|-----------------|--------------------------------------------------------------------|-----------|
| Rickettsiales | Midichloriaceae | Lariskella arthropodarum                                           | JQ726751  |
| Rickettsiales | Midichloriaceae | Lariskella arthropodarum                                           | JQ726738  |
| Rickettsiales | Midichloriaceae | Lariskella arthropodarum                                           | JQ726728  |
| Rickettsiales | Midichloriaceae | Uncultured bacterium clone CF2 (from Ctenocephalides felis)        | FJ981673  |
| Rickettsiales | Midichloriaceae | Uncultured bacterium clone XC1(from Xenopsylla cheopis)            | FJ981659  |
| Rickettsiales | Midichloriaceae | bacterium of Monastraea faveolata                                  | GU118640  |
| Rickettsiales | Midichloriaceae | bacterium of Monastraea faveolata                                  | GU118616  |
| Rickettsiales | Midichloriaceae | bacterium of Gorgonia ventalina                                    | GU118498  |
| Rickettsiales | Midichloriaceae | Uncultured bacterium clone Ho(lakePloen) 13 (from Hydra oligactis) | EF667901  |
| Rickettsiales | Midichloriaceae | uncultured alpha proteobacterium                                   | GQ302530  |
| Rickettsiales | Midichloriaceae | Endosymbiont of Acanthamoeba                                       | AF069963  |
| Rickettsiales | Midichloriaceae | Endosymbiont of Acanthamoeba                                       | AF069962  |
| Rickettsiales | Midichloriaceae | Anadelfobacter veles                                               | FN552695  |
| Rickettsiales | Midichloriaceae | Uncultured bacterium clone ID25L (from Oncorhynchus mykiss)        | EU555284  |
| Rickettsiales | Midichloriaceae | uncultured bacterium clone Hw124 (from Haemaphysalis wellingtoni)  | AF497583  |
| Rickettsiales | Midichloriaceae | Midichloria sp. Ixholo1                                            | FM992372  |
| Rickettsiales | Midichloriaceae | Candidatus Midichloria (from Hyalomma marginatum)                  | AM1813541 |
| Rickettsiales | Midichloriaceae | Midichloria mitochondrii IricVA                                    | CP002130  |
| Rickettsiales | Midichloriaceae | Midichloria mitochondrii                                           | AJ566640  |
